# Supplementary material for: Advanced Methylome Analysis after Bisulfite Deep Sequencing: An Example in Arabidopsis
Source: PLoS One. 2012 Jul 20;7(7):e41528. doi: 10.1371/journal.pone.0041528 (PMC3401099; doi:10.1371/journal.pone.0041528)
Supplement: Table S2 — Number of reads with given alignment length and identity. (XLS) [file pone.0041528.s006.xls]

## Sheet: Table S2 (length & identity)
Identity	Count	# Reads (in percent)
<5%	0	0
5-10%	0	0
10-15%	0	0
15-20%	2	1.38495e-06
20-25%	2	1.38495e-06
25-30%	35	2.42366e-05
30-35%	806	0.000558134
35-40%	2451	0.00169725
40-45%	7019	0.00486047
45-50%	11615	0.00804308
50-55%	45633	0.0315997
55-60%	142445	0.0986394
60-65%	505837	0.350279
65-70%	1681872	1.16465
70-75%	4412774	3.05573
75-80%	8543092	5.91587
80-85%	10878320	7.53295
85-90%	12287658	8.50888
90-95%	17594534	12.1838
95-100%	46959310	32.5181
Sum	103073405
Mapped length	Count	# Reads (in percent)
<30	798351	0.552837
30	165005	0.114262
31	210404	0.145699
32	261939	0.181386
33	323574	0.224067
34	399010	0.276304
35	477675	0.330777
36	570834	0.395288
37	682587	0.472674
38	803187	0.556186
39	947755	0.656296
40	1123081	0.777704
41	1312625	0.908959
42	1548423	1.07224
43	1845254	1.27779
44	2197225	1.52152
45	2675561	1.85276
46	3327026	2.30388
47	4292424	2.97239
48	6928710	4.79795
49	9665295	6.69296
50	5611295	3.88568
51	3297604	2.2835
52	3827311	2.65031
53	4880706	3.37976
54	5726574	3.9655
55	11872910	8.22168
56	24592939	17.03
57	2049032	1.4189
58	495868	0.343376
59	129004	0.0893319
60 .. 63	28405	0.0196697
sum	103067593	71.3716
