# Supplementary material for: Advanced Methylome Analysis after Bisulfite Deep Sequencing: An Example in Arabidopsis
Source: PLoS One. 2012 Jul 20;7(7):e41528. doi: 10.1371/journal.pone.0041528 (PMC3401099; doi:10.1371/journal.pone.0041528)
Supplement: Table S5 — C-context methylation statistics. (XLS) [file pone.0041528.s009.xls]

## Sheet: Table S5 (C-context methyl)
Context	BiSS	A3M	Overlap	# Reads (in percent)
CG	1519159	1249751	1196278	95.7213
CHG	709257	515854	434538	84.2366
CHH	731938	501842	208964	41.6394
Sum	2960354	2267447
	CG	CHG	CHH	Sum
Whole_genome	5570722	6096971	31208318	42876011
A3M_context	1249751	515854	501842	2267447
BiSS_context	1519159	709257	731938	2960354
