# Supplementary material for: Advanced Methylome Analysis after Bisulfite Deep Sequencing: An Example in Arabidopsis
Source: PLoS One. 2012 Jul 20;7(7):e41528. doi: 10.1371/journal.pone.0041528 (PMC3401099; doi:10.1371/journal.pone.0041528)
Supplement: Table S9 — Characteristics of validated regions (M/U category). (XLS) [file pone.0041528.s013.xls]

## Sheet: Legend
Description of tables 6-20 for validated experiments
Column	Description
Coordinates	Genomic coordinates
A3M_C	Number of A3M's mapped reads with C at that position
A3M_T	Number of A3M's mapped reads with T at that position
A3M_sum	Number of A3M's mapped reads at that position
A3M_meth	A3M methylation calling (1- methylated, 0- none)
BiSS_C	Number of BiSS' mapped reads with C at that position
BiSS_T	Number of BiSS' mapped reads with T at that position
BiSS_sum	Number of BiSS' mapped reads at that position
BiSS_global_pval	FDR-corrected binomial p-value in the pooled set
BiSS_agreement	Number of runs that are called methylated
BiSS_total runs	Number of runs with efficient coverage for methylation calling
C_context	CG, CHG or CHH context
CXX	Detail C-context
Validated_C	Number of validated clones with C at that position
Validated_T	Number of validated clones with T at that position
Validated_Sum	Number of validated clones

## Sheet: Table S9 (UU2)
Coordinates	A3M_C	A3M_T	A3M_sum	A3M_meth	BiSS_C	BiSS_T	BiSS_sum	BiSS_global_pval	BiSS_agreement	BiSS_tota runs	C_context	CXX	Validated_C	Validated_T	Validated_Sum
12818643	0	0	0	0	0	4	4	1	0	2	CHH	CTA	0	12	12
12818660	0	0	0	0	1	2	3	0.150968	0	2	CHH	CTT	0	12	12
12818664	0	0	0	0	0	4	4	1	0	2	CHH	CTT	0	12	12
12818669	0	0	0	0	1	2	3	0.150968	0	2	CG	CGG	0	10	12
12818682	0	0	0	0	0	3	3	1	0	2	CHH	CAT	0	12	12
12818690	0	0	0	0	0	1	1	1	0	1	CHG	CAG	1	11	12
12818699	0	0	0	0	1	0	1	1	1	1	CG	CGA	2	10	12
12818716	0	1	1	0	0	1	1	1	0	1	CHH	CTT	0	12	12
12818724	0	3	3	0	0	2	2	1	0	1	CHH	CTA	0	12	12
12818737	0	3	3	0	0	4	4	1	0	2	CHH	CAA	0	12	12
12818858	0	0	0	0	1	0	1	1	1	1	CHH	CTT	10	2	12
12818866	0	0	0	0	0	0	0	1	0	0	CHH	CCC	10	2	12
12818867	0	0	0	0	0	0	0	1	0	0	CHH	CCT	10	2	12
12818868	1	0	1	0	0	0	0	1	0	0	CHH	CTT	11	1	12
12818925	1	0	1	0	4	6	10	0.000175219	2	3	CHH	CTA	4	8	12
12818940	1	0	1	0	2	2	4	0.00990553	1	3	CHH	CTC	3	8	12
12818942	0	1	1	0	0	4	4	1	0	3	CHH	CAC	2	10	12
12818944	0	1	1	0	0	4	4	1	0	3	CHH	CTT	2	10	12
12818985	0	1	1	0	0	4	4	1	0	4	CHH	CCA	1	11	12
12818994	0	0	0	0	1	0	1	1	1	1	CHH	CAA	4	8	12
12819002	0	0	0	0	0	0	0	1	0	0	CHH	CTC	3	9	12
12819004	0	0	0	0	0	1	1	1	0	1	CHH	CCA	1	11	12
12819005	0	0	0	0	0	3	3	1	0	2	CHH	CAA	5	7	12
12819010	0	0	0	0	0	4	4	1	0	2	CHH	CCA	2	10	12
12819011	0	0	0	0	0	4	4	1	0	2	CHH	CAC	3	9	12
12819013	0	0	0	0	0	4	4	1	0	2	CHH	CTC	3	9	12
12819026	0	1	1	0	0	6	6	1	0	3	CHH	CTT	2	10	12
12819030	0	1	1	0	0	6	6	1	0	3	CHH	CTT	2	10	12
12819037	0	1	1	0	0	8	8	1	0	3	CHH	CTC	2	10	12
