# Supplementary material for: Advanced Methylome Analysis after Bisulfite Deep Sequencing: An Example in Arabidopsis
Source: PLoS One. 2012 Jul 20;7(7):e41528. doi: 10.1371/journal.pone.0041528 (PMC3401099; doi:10.1371/journal.pone.0041528)
Supplement: Table S16 — Characteristics of validated regions (M/X category). (XLS) [file pone.0041528.s020.xls]

## Sheet: Legend
Description of tables 6-20 for validated experiments
Column	Description
Coordinates	Genomic coordinates
A3M_C	Number of A3M's mapped reads with C at that position
A3M_T	Number of A3M's mapped reads with T at that position
A3M_sum	Number of A3M's mapped reads at that position
A3M_meth	A3M methylation calling (1- methylated, 0- none)
BiSS_C	Number of BiSS' mapped reads with C at that position
BiSS_T	Number of BiSS' mapped reads with T at that position
BiSS_sum	Number of BiSS' mapped reads at that position
BiSS_global_pval	FDR-corrected binomial p-value in the pooled set
BiSS_agreement	Number of runs that are called methylated
BiSS_total runs	Number of runs with efficient coverage for methylation calling
C_context	CG, CHG or CHH context
CXX	Detail C-context
Validated_C	Number of validated clones with C at that position
Validated_T	Number of validated clones with T at that position
Validated_Sum	Number of validated clones

## Sheet: Table S16 (MX5)
Coordinates	A3M_C	A3M_T	A3M_sum	A3M_meth	BiSS_C	BiSS_T	BiSS_sum	BiSS_global_pval	BiSS_agreement	BiSS_total runs	C_context	CXX	Validated_C	Validated_T	Validated_Sum
8421678	0	0	0	0	0	1	1	1	0	1	CHH	CTA	8	2	10
8421687	0	0	0	0	0	1	1	1	0	1	CHH	CTT	7	3	10
8421689	0	0	0	0	0	0	0	1	0	0	CHH	CAC	5	5	10
8421690	0	0	0	0	0	0	0	1	0	0	CHH	CCA	4	6	10
8421705	0	0	0	0	0	0	0	1	0	0	CHH	CTT	8	2	10
8421707	0	0	0	0	0	0	0	1	0	0	CHH	CTC	9	1	10
8421708	0	0	0	0	0	0	0	1	0	0	CHH	CCT	6	4	10
8421716	0	0	0	0	0	1	1	1	0	1	CHH	CAA	6	4	10
8421729	0	0	0	0	0	1	3	1	0	2	CHH	CAT	5	5	10
8421736	1	0	1	0	3	1	4	0.000183187	2	3	CHH	CTT	9	1	10
8421738	1	0	1	0	3	1	4	0.000183187	2	3	CHH	CTC	9	1	10
8421740	1	0	1	0	3	1	4	0.000183187	2	3	CHH	CAC	8	2	10
8421743	1	0	1	0	2	2	4	0.0100043	1	3	CHH	CAT	8	2	10
8421750	1	0	1	0	3	1	4	0.000183187	2	3	CHH	CTT	9	1	10
8421779	0	0	0	0	1	1	2	0.111871	1	2	CHH	CTA	8	2	10
8421782	0	0	0	0	1	1	2	0.111871	1	2	CHH	CAA	8	2	10
8421787	0	0	0	0	1	0	1	1	1	1	CHH	CAT	7	3	10
8421790	0	0	0	0	0	0	1	1	0	1	CHH	CAA	7	3	10
8421808	0	0	0	0	1	0	1	1	1	1	CHH	CAT	8	2	10
8421824	0	0	0	0	4	0	4	1.1503e-06	2	2	CHH	CAT	8	2	10
8421827	0	0	0	0	3	1	4	0.000183187	2	2	CHH	CTT	8	2	10
8421832	0	0	0	0	2	2	4	0.0100043	1	2	CHH	CTA	7	3	10
8421833	0	0	0	0	2	2	4	0.0100043	1	2	CHH	CCT	7	3	10
8421835	0	0	0	0	5	1	6	1.44731e-07	2	2	CHH	CAC	8	2	10
8421836	0	0	0	0	5	2	7	4.79684e-07	3	3	CHH	CCA	8	2	10
8421840	0	0	0	0	7	0	7	1.269e-11	3	3	CHH	CTT	8	2	10
8421848	0	0	0	0	6	1	7	3.74635e-09	3	3	CHH	CAT	7	3	10
8421850	0	0	0	0	5	0	7	4.79684e-07	2	3	CHH	CAC	8	2	10
8421853	0	0	0	0	6	1	7	3.74635e-09	2	3	CHG	CAG	9	1	10
8421856	0	0	0	0	6	1	7	3.74635e-09	3	3	CHH	CAT	8	2	10
8421858	0	0	0	0	6	2	8	1.42342e-08	3	4	CHH	CAC	8	2	10
8421863	0	0	0	0	6	2	8	1.42342e-08	3	4	CHH	CTT	8	2	10
8421866	0	0	0	0	6	1	7	3.74635e-09	3	4	CHH	CAA	8	2	10
8421868	0	0	0	0	8	1	9	2.35307e-12	3	4	CHH	CAC	9	1	10
8421869	0	0	0	0	7	1	9	3.86544e-05	3	4	CHH	CCA	9	1	10
8421870	0	0	0	0	6	2	8	1.42342e-08	2	4	CHH	CCC	9	1	10
8421872	0	0	0	0	7	1	8	9.49335e-11	3	4	CHH	CTC	9	1	10
8421874	0	0	0	0	6	1	8	0.000471179	3	4	CHH	CTC	8	2	10
8421876	0	0	0	0	5	3	8	1.21326e-06	3	4	CHH	CTC	9	1	10
8421880	0	0	0	0	6	1	7	3.74635e-09	3	3	CHH	CTA	9	1	10
8421898	0	0	0	0	1	3	4	0.176045	0	2	CHH	CAT	4	6	10
8421906	0	1	1	0	1	3	4	0.176045	0	2	CHH	CAT	1	9	10
8421924	0	1	1	0	0	4	5	1	0	3	CHH	CTT	1	9	10
8421940	1	2	3	0	2	2	5	0.0153422	1	3	CHG	CTG	7	3	10
8421947	1	2	3	0	3	2	5	0.000430952	1	3	CHH	CTA	2	8	10
8421954	0	3	3	0	0	4	4	1	0	2	CHH	CTA	1	9	10
8421985	0	1	1	0	0	3	3	1	0	2	CHH	CAT	0	10	10
8422001	0	1	1	0	0	3	3	1	0	2	CHH	CAA	0	10	10
8422007	0	1	1	0	0	3	3	1	0	2	CHG	CAG	0	10	10
